# Supplementary material for: Molecular and dissociative adsorption of water and hydrogen sulfide at perfect and defective Cu(110) surfaces
Source: Royal Society of Chemistry journal article supplement (doi:10.1039/c6cp07732c), 2017-01-01
Supplement: c6cp07732c1.pdf [file c6cp07732c1.pdf]

**Supplementary information for**

**Molecular and dissociative adsorption of water and hydrogen sulfide at  
perfect and defective Cu(110) surfaces**

Cláudio M. Lousada,<sup>†,\*</sup> Adam Johannes Johansson,<sup>‡</sup> and Pavel A. Korzhavii<sup>†</sup>

<sup>†</sup>Division of Materials Technology, Department of Materials Science and Engineering,  
KTH Royal Institute of Technology, SE-100 44 Stockholm, Sweden

<sup>‡</sup> Swedish Nuclear Fuel and Waste Management Co. (SKB), Box 250 SE-101 24, Stockholm,  
Sweden

\* To whom correspondence should be addressed: phone, (46) 879 06 252; e-mail, [cmlp@kth.se](mailto:cmlp@kth.se)

- Adsorption site names:

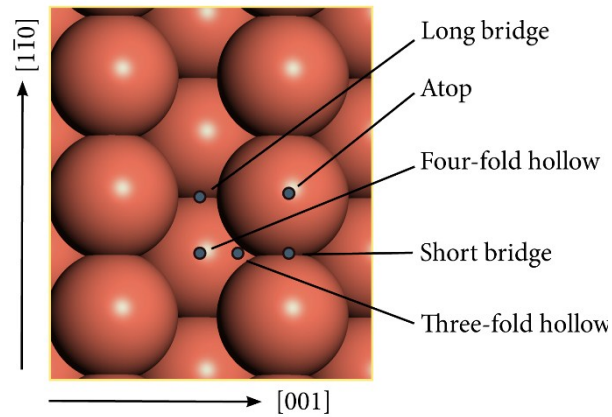

Figure S1. Adsorption site names for the Cu(110) surface employed in this work.

- Measurements for understanding the relaxation and reconstruction upon adsorption of HS and HO on the perfect and on the defective Cu(110):

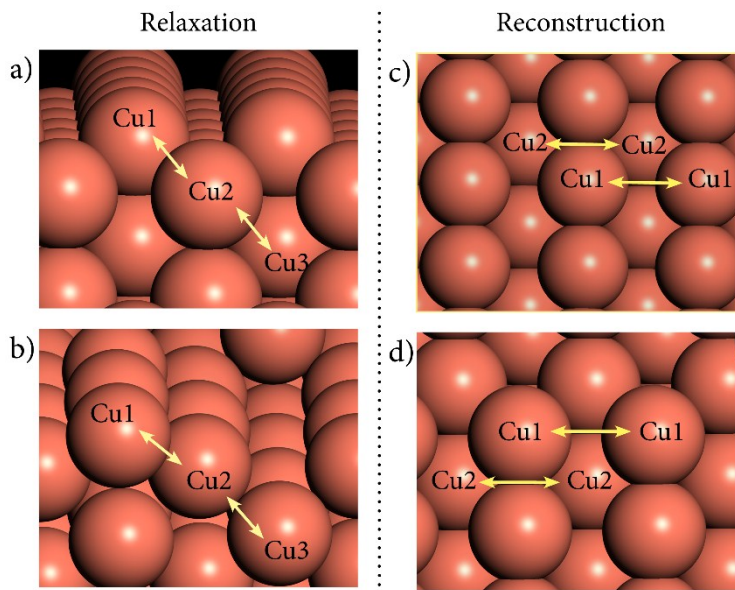

Figure S2. Relaxation and reconstruction for the perfect (a), (c) and defective (b), (d) Cu(110). The distances between the atoms shown on Table 2 were measured as indicated by the arrows.
